# Supplementary material
Source: PubMed Central journal article supplement (PMC6362983)
Supplement: NIHMS1009400-supplement-Supplemental_Data.pdf [file NIHMS1009400-supplement-Supplemental_Data.pdf]

**SUPPLEMENT****Initial QC**

Initial QC had already been carried out on each of the GWAS studies (Supplemental Table VI), using the GENEVA protocol or protocols that were similar. Some of the pertinent QC parameters used for each of the studies are included in Supplemental Table VII.

**Imputation**

The imputation was done by first matching the strand of the GWAS data with the 1KGP data after excluding ambiguous A/T or C/G SNPs. We used the 1kGP reference panel (1092 samples; v2.20101123 for GECCO; v3.20101123 for GARNET, HIPFX, MOPMAP, and WHIMS+). The GWAS data were split into chunks with each chunk having 10,000 SNPs and neighboring chunks have 1000 overlapping SNPs. Then all chunks were phased using Beagle and then combined using mergebeaglechunks.jar (available from the BEAGLE website). An autoclip file was created for minimac to specify what the range of the chunks (start and stop) and the SNPs to be imputed within the chunk (core\_start and core\_end) so that no SNP needed to be imputed twice. All chunks were imputed into 1kGP using minimac. SNPs that could not be imputed with high enough confidence (cut-off  $R^2 > 0.1$ ) were omitted for that particular study (but still appear as columns of missing data in files if they were kept in the other studies, to facilitate alignment). We did not impute the X chromosome. The SHARe study was independently imputed to the same reference panel. The procedures used were similar to those listed above, except that MACH was used to carry out the imputation.

**Harmonization**

A panel of 5665 SNPs was used for checking the pairwise concordance among all samples in GARNET, GECCO, HIPFX, SHARe, WHIMS+, and MOPMAP. The same panel of SNPs was used for principal component check together with HapMap samples to identify ethnicity outlier. The same panel of SNPs were used for checking IBD in plink to identify relatedness among samples. Another principal component analysis was done for combined samples (after removing of ineligible duplicates) in all studies then the resulting PCs were mapped back to samples within each study. A NetCDF file of imputed results was created for each chromosome in each study. Different studies have the same set of SNPs — SNPs that were not successfully imputed in a particular study but are in other studies are listed as missing values. A SNP info file was also created along with each NetCDF file describing the SNP name, chromosome, position,

count allele, alternative allele, count allele frequency, and imputation quality for each SNP.

**Duplicates**

Because subjects for each of these GWAS were selected independently, we checked for duplicates between the studies. We removed a small number of samples that were supposed to be duplicates but had a concordance rate <90% and appeared to be duplicates but were from unrelated individuals who appeared not to be monozygotic twins. We kept samples that were monozygotic twins (see relatedness below), and duplicates between studies in our datasets. There currently are 29,846 unique subjects in the data.

**Relatedness**

We carried out an IBD analysis using a subset of 5665 SNPs and the PLINK package. We used the results to identify 42 parent off-spring pairs and 303 pairs of siblings/first-degree relatives. We did not identify second and higher degree relatives (eg, cousins, half-siblings, etc).

**Genetic risk score (GRS) calculation**

Beta coefficients of 21 SNPs reported in published literature were used as weights and the following formula was applied to calculate the genetic risk score:

$$GS = \sum_{s=1}^{21} W_s \sum_{k=1}^2 EA_{sk}$$

where  $EA$  is an indicator for the presence of effect alleles at allele  $k$  at SNP  $s$  ( $s = 0,1$ ) and  $W_s$  represents the beta coefficient estimates of effect allele of SNP  $s$  from published literature. We verified that the effect allele and allele frequency we used in our study matched with the alleles and allele frequency listed in the published literature.

**Area under curve (AUC) calculation**

To assess the performance of the predictive capability of the GRS for incident melanoma, the c-index was calculated using rcorr.cens function in the Hmisc package.<sup>9</sup> The c-index was calculated based on a model including the covariates described earlier with and without the GRS tertiles.<sup>10</sup> We calculated the AUC for lifetime melanoma models using pROC package.<sup>11</sup> To calculate the confidence interval of the difference, we bootstrapped the sample 1000 times in each imputation and calculated the difference for c-index/AUC for each bootstrapped sample. The observed mean and standard deviation of the difference of c-index/AUC for each imputation were pooled using Rubin's rules<sup>12</sup> to obtain a 95% confidence interval.

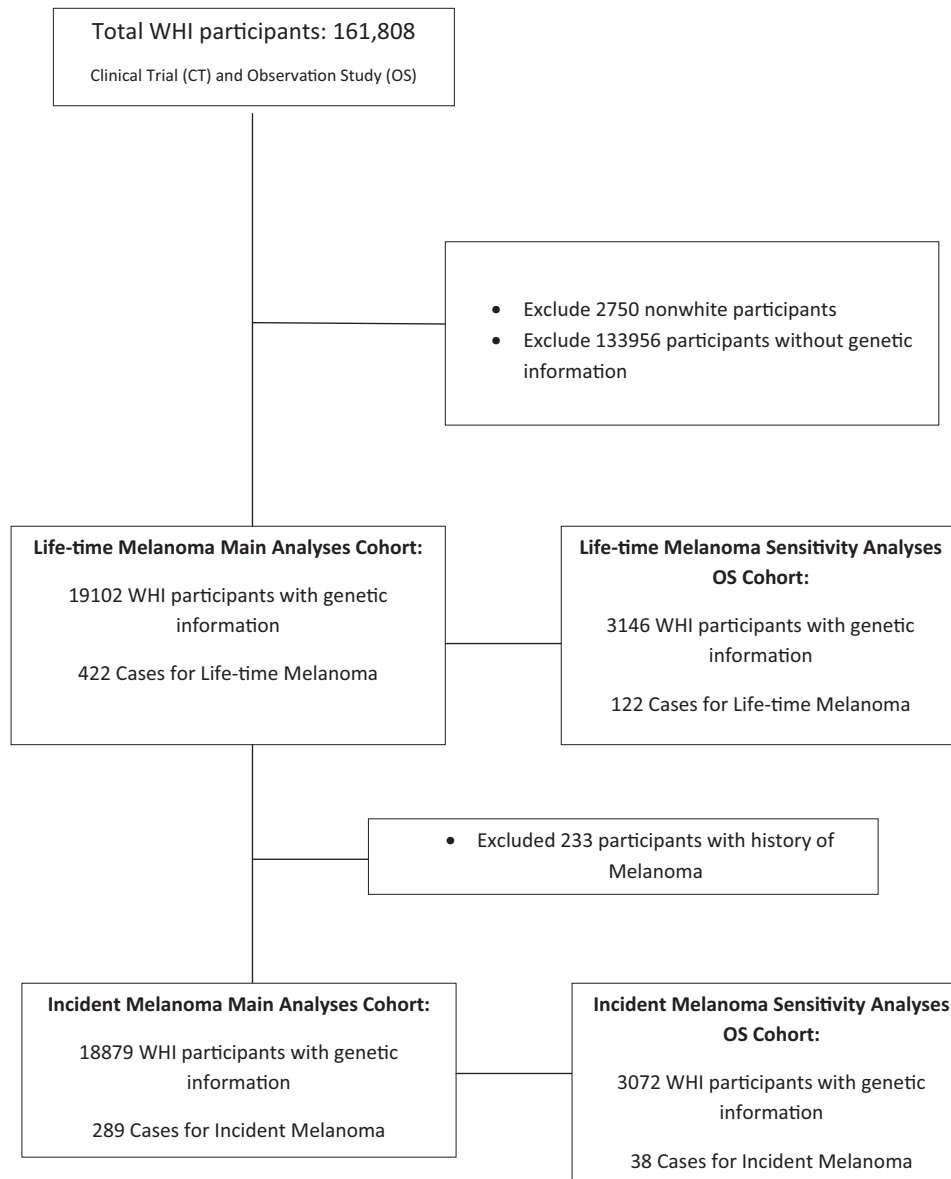

**Supplemental Fig 1.** Diagram of analytic population. A total of 19,102 white women with genotype information were included in the study. This included 422 lifetime melanoma cases and 289 incident melanoma cases.

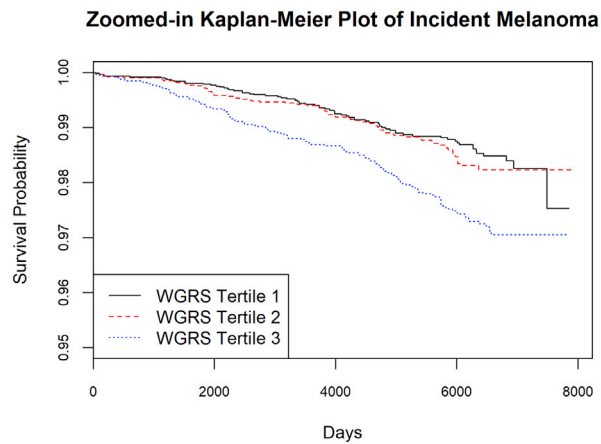

**Supplemental Fig 2.** Kaplan–Meier plot for incident melanoma in Women’s Health Initiative cohort. Compared to the lowest tertile of genetic risk score, the highest tertile of genetic risk score was associated with higher incident melanoma during >20 years of follow-up, with a hazard ratio of 1.89 for the highest tertile as compared to the lowest tertile (95% confidence interval 1.42-2.52).

**Supplemental Table I.** Demographics of the whole cohort

|                                                                                          | Women with<br>weighted GRS<br>(N = 19,102) | Women with<br>weighted GRS<br>but no history<br>of melanoma<br>(n = 18,879) | GRS first<br>tertile<br>(n = 6252) | GRS second<br>tertile<br>(n = 6254) | GRS third<br>tertile<br>(n = 6506) |
|------------------------------------------------------------------------------------------|--------------------------------------------|-----------------------------------------------------------------------------|------------------------------------|-------------------------------------|------------------------------------|
| Region, n (%)                                                                            |                                            |                                                                             |                                    |                                     |                                    |
| Northeast                                                                                | 5064 (26.6)                                | 5034 (26.7)                                                                 | 1702 (27.2)                        | 1660 (26.5)                         | 1702 (26.2)                        |
| South                                                                                    | 3888 (20.5)                                | 3854 (20.4)                                                                 | 1253 (20)                          | 1290 (20.6)                         | 1345 (20.7)                        |
| Midwest                                                                                  | 4724 (24.8)                                | 4703 (24.9)                                                                 | 1482 (23.7)                        | 1555 (24.9)                         | 1687 (25.9)                        |
| West                                                                                     | 5336 (28.1)                                | 5288 (28)                                                                   | 1815 (29)                          | 1749 (28)                           | 1772 (27.2)                        |
| Education, n (%)                                                                         |                                            |                                                                             |                                    |                                     |                                    |
| High school                                                                              | 4839 (25.5)                                | 4814 (25.5)                                                                 | 1622 (25.9)                        | 1562 (25)                           | 1655 (25.4)                        |
| College                                                                                  | 9476 (49.8)                                | 9411 (49.8)                                                                 | 3062 (49)                          | 3162 (50.6)                         | 3252 (50)                          |
| Beyond college                                                                           | 4625 (24.3)                                | 4583 (24.3)                                                                 | 1542 (24.7)                        | 1503 (24)                           | 1580 (24.3)                        |
| Missing                                                                                  | 72 (0.4)                                   | 71 (0.4)                                                                    | 26 (0.4)                           | 27 (0.4)                            | 19 (0.3)                           |
| Latitude, n (%)                                                                          |                                            |                                                                             |                                    |                                     |                                    |
| Southern, <35°N                                                                          | 4618 (24.3)                                | 4577 (24.2)                                                                 | 1554 (24.9)                        | 1534 (24.5)                         | 1530 (23.5)                        |
| Middle, 35-40°N                                                                          | 5333 (28.1)                                | 5285 (28)                                                                   | 1769 (28.3)                        | 1718 (27.5)                         | 1846 (28.4)                        |
| Northern, >40°N                                                                          | 9061 (47.7)                                | 9017 (47.8)                                                                 | 2929 (46.8)                        | 3002 (48)                           | 3130 (48.1)                        |
| Langley (g-cal/cm <sup>2</sup> ), n (%)                                                  |                                            |                                                                             |                                    |                                     |                                    |
| 300-325                                                                                  | 6349 (33.4)                                | 6321 (33.5)                                                                 | 2050 (32.8)                        | 2104 (33.6)                         | 2195 (33.7)                        |
| 350                                                                                      | 4425 (23.3)                                | 4393 (23.3)                                                                 | 1443 (23.1)                        | 1446 (23.1)                         | 1536 (23.6)                        |
| 375-380                                                                                  | 1912 (10.1)                                | 1895 (10)                                                                   | 607 (9.7)                          | 630 (10.1)                          | 675 (10.4)                         |
| 400-430                                                                                  | 2881 (15.2)                                | 2859 (15.1)                                                                 | 961 (15.4)                         | 950 (15.2)                          | 970 (14.9)                         |
| 475-500                                                                                  | 3445 (18.1)                                | 3411 (18.1)                                                                 | 1191 (19)                          | 1124 (18)                           | 1130 (17.4)                        |
| Smoke, n (%)                                                                             |                                            |                                                                             |                                    |                                     |                                    |
| Never smoked                                                                             | 9509 (50)                                  | 9450 (50.1)                                                                 | 3122 (49.9)                        | 3102 (49.6)                         | 3285 (50.5)                        |
| Past smoker                                                                              | 7770 (40.9)                                | 7702 (40.8)                                                                 | 2596 (41.5)                        | 2549 (40.8)                         | 2625 (40.3)                        |
| Current smoker                                                                           | 1514 (8)                                   | 1509 (8)                                                                    | 457 (7.3)                          | 527 (8.4)                           | 530 (8.1)                          |
| Missing                                                                                  | 219 (1.2)                                  | 218 (1.2)                                                                   | 77 (1.2)                           | 76 (1.2)                            | 66 (1)                             |
| Take multivitamin, n (%)                                                                 |                                            |                                                                             |                                    |                                     |                                    |
| No                                                                                       | 18,204 (95.8)                              | 18,076 (95.7)                                                               | 5977 (95.6)                        | 5998 (95.9)                         | 6229 (95.7)                        |
| Yes                                                                                      | 808 (4.2)                                  | 803 (4.3)                                                                   | 275 (4.4)                          | 256 (4.1)                           | 277 (4.3)                          |
| Take calcium, n (%)                                                                      |                                            |                                                                             |                                    |                                     |                                    |
| No                                                                                       | 15,056 (79.2)                              | 14,956 (79.2)                                                               | 4923 (78.7)                        | 4940 (79)                           | 5193 (79.8)                        |
| Yes                                                                                      | 3956 (20.8)                                | 3923 (20.8)                                                                 | 1329 (21.3)                        | 1314 (21)                           | 1313 (20.2)                        |
| Take vitamin D, n (%)                                                                    |                                            |                                                                             |                                    |                                     |                                    |
| No                                                                                       | 18,258 (96)                                | 18,132 (96)                                                                 | 6012 (96.2)                        | 6004 (96)                           | 6242 (95.9)                        |
| Yes                                                                                      | 754 (4)                                    | 747 (4)                                                                     | 240 (3.8)                          | 250 (4)                             | 264 (4.1)                          |
| Take aspirin, n (%)                                                                      |                                            |                                                                             |                                    |                                     |                                    |
| No                                                                                       | 14,080 (74.1)                              | 13,977 (74)                                                                 | 4636 (74.2)                        | 4642 (74.2)                         | 4802 (73.8)                        |
| Yes                                                                                      | 4932 (25.9)                                | 4902 (26)                                                                   | 1616 (25.8)                        | 1612 (25.8)                         | 1704 (26.2)                        |
| Age, median (IQR)                                                                        |                                            |                                                                             |                                    |                                     |                                    |
|                                                                                          | 68 (63-72)                                 | 68 (63-72)                                                                  | 68 (63-72)                         | 68 (63-72)                          | 67 (63-72)                         |
| BMI, median (IQR)                                                                        |                                            |                                                                             |                                    |                                     |                                    |
|                                                                                          | 27.6 (24.2-31.7)                           | 27.6 (24.2-31.7)                                                            | 27.4 (24.1-31.5)                   | 27.7 (24.3-31.7)                    | 27.6 (24.1-31.7)                   |
| Total energy expended from recreational physical activity (MET hours/week), median (IQR) |                                            |                                                                             |                                    |                                     |                                    |
|                                                                                          | 7.5 (1.9-16.7)                             | 7.5 (1.9-16.7)                                                              | 7.5 (1.9-16.7)                     | 7.5 (1.9-16.4)                      | 7.5 (1.9-16.5)                     |
| MET hours per week from walking, median (IQR)                                            |                                            |                                                                             |                                    |                                     |                                    |
|                                                                                          | 2 (0-6.2)                                  | 2 (0-6.2)                                                                   | 2 (0-6.2)                          | 1.9 (0-6.2)                         | 2 (0-6.2)                          |

BMI, Body mass index; GRS, genetic risk score; IQR, interquartile range; MET, metabolic equivalent.

**Supplemental Table II.** Demographics for observational study cohort with sunscreen and skin type

|                                                                                                | Women with<br>weighted GRS<br>(n = 3146) | Women with<br>weighted GRS<br>but no history<br>of melanoma<br>(n = 3072) | GRS first<br>quartile<br>(n = 1106) | GRS second<br>quartile<br>(n = 1031) | GRS third<br>quartile<br>(n = 1009) |
|------------------------------------------------------------------------------------------------|------------------------------------------|---------------------------------------------------------------------------|-------------------------------------|--------------------------------------|-------------------------------------|
| Region, n (%)                                                                                  |                                          |                                                                           |                                     |                                      |                                     |
| Northeast                                                                                      | 818 (26)                                 | 803 (26.1)                                                                | 282 (25.5)                          | 254 (24.6)                           | 282 (27.9)                          |
| South                                                                                          | 681 (21.6)                               | 661 (21.5)                                                                | 230 (20.8)                          | 241 (23.4)                           | 210 (20.8)                          |
| Midwest                                                                                        | 698 (22.2)                               | 685 (22.3)                                                                | 237 (21.4)                          | 228 (22.1)                           | 233 (23.1)                          |
| West                                                                                           | 949 (30.2)                               | 923 (30)                                                                  | 357 (32.3)                          | 308 (29.9)                           | 284 (28.1)                          |
| Education, n (%)                                                                               |                                          |                                                                           |                                     |                                      |                                     |
| High school                                                                                    | 633 (20.1)                               | 619 (20.1)                                                                | 227 (20.5)                          | 199 (19.3)                           | 207 (20.5)                          |
| College                                                                                        | 1563 (49.7)                              | 1527 (49.7)                                                               | 514 (46.5)                          | 532 (51.6)                           | 517 (51.2)                          |
| Beyond college                                                                                 | 935 (29.7)                               | 911 (29.7)                                                                | 358 (32.4)                          | 295 (28.6)                           | 282 (27.9)                          |
| Missing                                                                                        | 15 (0.5)                                 | 15 (0.5)                                                                  | 7 (0.6)                             | 5 (0.5)                              | 3 (0.3)                             |
| Latitude, n (%)                                                                                |                                          |                                                                           |                                     |                                      |                                     |
| Southern, <35°N                                                                                | 857 (27.2)                               | 832 (27.1)                                                                | 311 (28.1)                          | 297 (28.8)                           | 249 (24.7)                          |
| Middle, 35-40°N                                                                                | 904 (28.7)                               | 879 (28.6)                                                                | 323 (29.2)                          | 294 (28.5)                           | 287 (28.4)                          |
| Northern, >40°N                                                                                | 1385 (44)                                | 1361 (44.3)                                                               | 472 (42.7)                          | 440 (42.7)                           | 473 (46.9)                          |
| Langley (g-cal/cm <sup>2</sup> ), n (%)                                                        |                                          |                                                                           |                                     |                                      |                                     |
| 300-325                                                                                        | 1006 (32)                                | 992 (32.3)                                                                | 347 (31.4)                          | 313 (30.4)                           | 346 (34.3)                          |
| 350                                                                                            | 651 (20.7)                               | 635 (20.7)                                                                | 222 (20.1)                          | 217 (21)                             | 212 (21)                            |
| 375-380                                                                                        | 321 (10.2)                               | 312 (10.2)                                                                | 110 (9.9)                           | 114 (11.1)                           | 97 (9.6)                            |
| 400-430                                                                                        | 505 (16.1)                               | 492 (16)                                                                  | 177 (16)                            | 160 (15.5)                           | 168 (16.7)                          |
| 475-500                                                                                        | 663 (21.1)                               | 641 (20.9)                                                                | 250 (22.6)                          | 227 (22)                             | 186 (18.4)                          |
| Smoke, n (%)                                                                                   |                                          |                                                                           |                                     |                                      |                                     |
| Never smoked                                                                                   | 1524 (48.4)                              | 1491 (48.5)                                                               | 544 (49.2)                          | 501 (48.6)                           | 479 (47.5)                          |
| Past smoker                                                                                    | 1358 (43.2)                              | 1319 (42.9)                                                               | 479 (43.3)                          | 439 (42.6)                           | 440 (43.6)                          |
| Current smoker                                                                                 | 224 (7.1)                                | 223 (7.3)                                                                 | 71 (6.4)                            | 76 (7.4)                             | 77 (7.6)                            |
| Missing                                                                                        | 40 (1.3)                                 | 39 (1.3)                                                                  | 12 (1.1)                            | 15 (1.5)                             | 13 (1.3)                            |
| Take multivitamin, n (%)                                                                       |                                          |                                                                           |                                     |                                      |                                     |
| No                                                                                             | 2993 (95.1)                              | 2922 (95.1)                                                               | 1060 (95.8)                         | 981 (95.2)                           | 952 (94.4)                          |
| Yes                                                                                            | 153 (4.9)                                | 150 (4.9)                                                                 | 46 (4.2)                            | 50 (4.8)                             | 57 (5.6)                            |
| Take calcium, n (%)                                                                            |                                          |                                                                           |                                     |                                      |                                     |
| No                                                                                             | 2307 (73.3)                              | 2253 (73.3)                                                               | 809 (73.1)                          | 747 (72.5)                           | 751 (74.4)                          |
| Yes                                                                                            | 839 (26.7)                               | 819 (26.7)                                                                | 297 (26.9)                          | 284 (27.5)                           | 258 (25.6)                          |
| Take vitamin D, n (%)                                                                          |                                          |                                                                           |                                     |                                      |                                     |
| No                                                                                             | 2974 (94.5)                              | 2905 (94.6)                                                               | 1048 (94.8)                         | 966 (93.7)                           | 960 (95.1)                          |
| Yes                                                                                            | 172 (5.5)                                | 167 (5.4)                                                                 | 58 (5.2)                            | 65 (6.3)                             | 49 (4.9)                            |
| Take aspirin, n (%)                                                                            |                                          |                                                                           |                                     |                                      |                                     |
| No                                                                                             | 2285 (72.6)                              | 2230 (72.6)                                                               | 810 (73.2)                          | 767 (74.4)                           | 708 (70.2)                          |
| Yes                                                                                            | 861 (27.4)                               | 842 (27.4)                                                                | 296 (26.8)                          | 264 (25.6)                           | 301 (29.8)                          |
| Skin type, n (%)                                                                               |                                          |                                                                           |                                     |                                      |                                     |
| No burn                                                                                        | 1132 (36)                                | 1113 (36.2)                                                               | 460 (41.6)                          | 376 (36.5)                           | 296 (29.3)                          |
| Burn                                                                                           | 1569 (49.9)                              | 1524 (49.6)                                                               | 482 (43.6)                          | 513 (49.8)                           | 574 (56.9)                          |
| Missing                                                                                        | 445 (14.1)                               | 435 (14.2)                                                                | 164 (14.8)                          | 142 (13.8)                           | 139 (13.8)                          |
| Used sunscreen, n (%)                                                                          |                                          |                                                                           |                                     |                                      |                                     |
| No                                                                                             | 1378 (43.8)                              | 1357 (44.2)                                                               | 527 (47.6)                          | 445 (43.2)                           | 406 (40.2)                          |
| Yes                                                                                            | 1360 (43.2)                              | 1316 (42.8)                                                               | 435 (39.3)                          | 453 (43.9)                           | 472 (46.8)                          |
| Missing                                                                                        | 408 (13)                                 | 399 (13)                                                                  | 144 (13)                            | 133 (12.9)                           | 131 (13)                            |
| Age, median (IQR)                                                                              | 69 (64-74)                               | 69 (64-74)                                                                | 70 (64-74)                          | 69 (64-73)                           | 69 (64-74)                          |
| BMI, median (IQR)                                                                              | 25.6 (22.8-29.3)                         | 25.6 (22.8-29.3)                                                          | 25.4 (22.6-29.2)                    | 25.8 (22.8-29.8)                     | 25.6 (22.9-29.1)                    |
| Total energy expended from<br>recreational physical activity<br>(MET hours/week), median (IQR) | 9.8 (3-18.8)                             | 9.8 (3-18.5)                                                              | 10 (3.5-19.2)                       | 9 (3-17.6)                           | 9.5 (2.5-18.6)                      |
| MET hours per week from walking,<br>median (IQR)                                               | 3.5 (0-7.5)                              | 3.5 (0-7.5)                                                               | 3.5 (0-7.5)                         | 3.8 (0-7.5)                          | 2.5 (0-7.5)                         |

BMI, Body mass index; GRS, genetic risk score; IQR, interquartile range; MET, metabolic equivalent.

**Supplemental Table III.** Association of 21 genome-wide significant melanoma single-nucleotide polymorphisms in the Women’s Health Initiative cohort

| SNP         | Nearest gene           | WHI MAF | WHI OR (95% CI)     | WHI P value | Reported MAF | Reported OR | Reported P value       | Reference                                                          |
|-------------|------------------------|---------|---------------------|-------------|--------------|-------------|------------------------|--------------------------------------------------------------------|
| rs7412746   | ARNT                   | 0.49    | 1.01 (0.87-1.14)    | .927        | 0.47         | 1.08        | $2.46 \times 10^{-4}$  | Macgregor <i>et al.</i> , 2011                                     |
| rs6750047   | RMDN2 (CYP1B1)         | 0.46    | 1.01 (0.87-1.15)    | .89         | 0.28         | 1.02        | $2.48 \times 10^{-1}$  | Law <i>et al.</i> , 2015                                           |
| rs13016963  | CASP8                  | 0.39    | 0.92 (0.78-1.06)    | .234        | 0.38         | 0.94        | $6.93 \times 10^{-3}$  | Barrett <i>et al.</i> , 2011 and Antonopoulou <i>et al.</i> , 2015 |
| rs139996880 | TERT                   | 0.16    | 1.05 (0.74-1.35)    | .76         | 0.16         | 1.26        | $2.4 \times 10^{-11}$  | Law <i>et al.</i> , 2015                                           |
| rs16891982* | SLC45A2                | 0.11    | 0.5 (–0.01 to 1.00) | .007        | 0.04         | 0.48        | $9.02 \times 10^{-19}$ | Antonopoulou <i>et al.</i> , 2015                                  |
| rs6914598   | CDKAL1                 | 0.32    | 1.02 (0.86-1.17)    | .842        | 0.31         | 1.05        | $2.22 \times 10^{-2}$  | Law <i>et al.</i> , 2015                                           |
| rs1636744   | AGR3                   | 0.4     | 1.07 (0.94-1.21)    | .31         | 0.41         | 1.04        | $5.59 \times 10^{-2}$  | Law <i>et al.</i> , 2015                                           |
| rs7023329   | MTAP (CDKN2A)          | 0.5     | 0.92 (0.78-1.06)    | .233        | 0.5          | 0.86        | $2.29 \times 10^{-13}$ | Barrett <i>et al.</i> , 2011                                       |
| rs10739221  | TMEM38B (RAD23B, TAL2) | 0.26    | 1.08 (0.91-1.24)    | .378        | 0.24         | 1.1         | $7.39 \times 10^{-5}$  | Law <i>et al.</i> , 2015                                           |
| rs2995264   | OBFC1                  | 0.1     | 1.07 (0.84-1.30)    | .575        | 0.1          | 1.16        | $2.75 \times 10^{-5}$  | Law <i>et al.</i> , 2015                                           |
| rs1393350*  | TYR                    | 0.25    | 1.21 (1.06-1.36)    | .014        | 0.27         | 1.17        | $1.90 \times 10^{-11}$ | Bishop <i>et al.</i> , 2009 and Barrett <i>et al.</i> , 2011       |
| rs498136    | CCND1                  | 0.35    | 1.09 (0.95-1.23)    | .242        | 0.36         | 1.09        | $8.98E \times 10^{-5}$ | Law <i>et al.</i> , 2015                                           |
| rs1801516   | ATM                    | 0.13    | 1.00 (0.80-1.20)    | .979        | 0.14         | 0.95        | $7.42 \times 10^{-2}$  | Barrett <i>et al.</i> , 2011                                       |
| rs4778138*  | OCA2                   | 0.18    | 0.70 (0.47-0.94)    | .003        | 0.15         | 0.9         | $5.68 \times 10^{-4}$  | Law <i>et al.</i> , 2015                                           |
| rs258322*   | MC1R                   | 0.12    | 1.49 (1.29-1.70)    | .0001       | 0.09         | 1.31        | $3.87 \times 10^{-16}$ | Bishop <i>et al.</i> , 2009 and Barrett <i>et al.</i> , 2011       |
| rs4785763*  | AFG3L1P                | 0.33    | 1.31 (1.16-1.46)    | .0003       | 0.33         | 1.21        | $3.47 \times 10^{-18}$ | Bishop <i>et al.</i> , 2009 and Antonopoulou <i>et al.</i> , 2015  |
| rs16953002  | FTO                    | 0.17    | 1.04 (0.86-1.23)    | .633        | 0.17         | 1.01        | $7.54 \times 10^{-1}$  | Antonopoulou <i>et al.</i> , 2015 and Iles <i>et al.</i> , 2013    |
| rs1885120   | MYH7B                  | 0.06    | 1.39 (1.03-1.57)    | .061        | 0.07         | 1.34        | $4.02 \times 10^{-16}$ | Antonopoulou <i>et al.</i> , 2015                                  |
| rs910873*   | PIGU                   | 0.07    | 1.30 (1.06-1.53)    | .031        | 0.08         | 1.35        | $2.61 \times 10^{-17}$ | Brown <i>et al.</i> , 2008                                         |
| rs45430*    | MX2                    | 0.42    | 0.82 (0.67-0.97)    | .008        | 0.4          | 0.89        | $8.80 \times 10^{-8}$  | Barrett <i>et al.</i> , 2011                                       |
| rs2284063   | PLA2G6                 | 0.37    | 0.92 (0.78-1.06)    | .25         | 0.36         | 0.95        | $1.21 \times 10^{-2}$  | Bishop <i>et al.</i> , 2009                                        |

CI, Confidence interval; MAF, minor allele frequency; OR, odds ratio; SNP, single-nucleotide polymorphism.

\*Statistically significant ( $P < .05$ ).

**Supplemental Table IV.** Sensitivity analysis for lifetime melanoma, adjusted for skin type, sunscreen, and latitude individually

| <b>Logistic model on lifetime melanoma (N = 3146, n cases = 112), adjust for skin type</b> |                   |                |
|--------------------------------------------------------------------------------------------|-------------------|----------------|
| <b>Variable</b>                                                                            | <b>OR (95%CI)</b> | <b>P value</b> |
| Age (5-year)                                                                               | 1.09 (0.94-1.26)  | .27            |
| Skin Type (burn vs no burn)                                                                | 1.81 (1.11-2.95)  | .02            |
| WGRS second tertile vs first tertile                                                       | 1.42 (0.82-2.46)  | .21            |
| WGRS third tertile vs first tertile                                                        | 2.64 (1.61-4.34)  | <.01*          |
| <b>Logistic model on lifetime melanoma (N = 3146, n cases = 112), adjust for sunscreen</b> |                   |                |
| <b>Variable</b>                                                                            | <b>OR (95%CI)</b> | <b>P value</b> |
| Age (5-year)                                                                               | 1.06 (0.91-1.23)  | .44            |
| Sunscreen (yes vs no)                                                                      | 2.27 (1.44-3.58)  | <.01           |
| WGRS second tertile vs first tertile                                                       | 1.42 (0.82-2.46)  | .21            |
| WGRS third tertile vs first tertile                                                        | 2.75 (1.66-4.45)  | <.01*          |
| <b>Logistic model on lifetime melanoma (N = 3146, n cases = 112), adjust for latitude</b>  |                   |                |
| <b>Variable</b>                                                                            | <b>OR (95%CI)</b> | <b>P value</b> |
| Age (5-year)                                                                               | 1.05 (0.91-1.21)  | .53            |
| Latitude (Southern vs Northern)                                                            | 1.39 (0.88-2.2)   | .16            |
| Latitude (Middle vs Northern)                                                              | 1.46 (0.92-2.32)  | .11            |
| WGRS second tertile vs first tertile                                                       | 1.47 (0.85-2.54)  | .17            |
| WGRS third tertile vs first tertile                                                        | 2.92 (1.79-4.78)  | <.01*          |

WGRS, Weight genetic risk score.

\*Statistically significant ( $P < .05$ ).

**Supplemental Table V.** Sensitivity analysis for incident melanoma, adjusted for skin type, sunscreen, and latitude individually

| Survival model on incident melanoma (N = 3072, n cases = 38), adjust for skin type |                  |         |
|------------------------------------------------------------------------------------|------------------|---------|
| Variable                                                                           | HR (95% CI)      | P value |
| Age (5-year)                                                                       | 0.98 (0.77-1.24) | .84     |
| Skin type (burn vs no burn)                                                        | 2.81 (1.04-7.57) | .05     |
| WGRS second tertile vs first tertile                                               | 1.15 (0.44-2.97) | .78     |
| WGRS third tertile vs first tertile                                                | 2.65 (1.17-6.01) | .02*    |
| Survival model on incident melanoma (N = 3072, n cases = 38), adjust for sunscreen |                  |         |
| Variable                                                                           | HR (95% CI)      | P value |
| Age (5-year)                                                                       | 0.93 (0.73-1.18) | .56     |
| Sunscreen (yes vs. no)                                                             | 2.96 (1.37-6.4)  | .01     |
| WGRS second tertile vs first tertile                                               | 1.14 (0.44-2.95) | .79     |
| WGRS third tertile vs first tertile                                                | 2.72 (1.2-6.16)  | .02*    |
| Survival model on incident melanoma (N = 3072, n cases = 38), adjust for latitude  |                  |         |
| Variable                                                                           | HR (95% CI)      | P value |
| Age (5-year)                                                                       | 0.93 (0.74-1.18) | .55     |
| Latitude (Southern vs Northern)                                                    | 1.05 (0.49-2.24) | .90     |
| Latitude (Middle vs Northern)                                                      | 1.07 (0.49-2.35) | .86     |
| WGRS second tertile vs first tertile                                               | 1.19 (0.46-3.09) | .72     |
| WGRS third tertile vs first tertile                                                | 3.00 (1.33-6.78) | .01*    |

WGRS, Weight genetic risk score.

\*Statistically significant ( $P < .05$ ).



**Supplemental Table VI.** The harmonization/imputation effort involving 6 genome-wide association studies

|                                       | WHI study* (no.)        |                               |                                                                       |                                  |                                |                                                                                            |
|---------------------------------------|-------------------------|-------------------------------|-----------------------------------------------------------------------|----------------------------------|--------------------------------|--------------------------------------------------------------------------------------------|
|                                       | Hip fracture GWAS (BA3) | SHARe (M5)                    | GARNET (M13)                                                          | WHIMS+ (W63)                     | GECCO (AS224)                  | MOPMAP (AS264)                                                                             |
| Directly genotyped GWAS data on dbGaP | No                      | Yes                           | Yes                                                                   | Data uploaded to dbGaP June 2013 | No                             | No                                                                                         |
| Study that funded GWAS                | WHI-BAA3 (NHLBI)        | NHLBI                         | WHI-GARNET (NHGRI)                                                    | NHLBI                            | WHI-AS224 (NCI)                | WHI-AS264 (NIEHS and UNC)                                                                  |
| GWAS platform                         | Illumina 550K and 610K  | Affymetrix 6.0                | Illumina HumanOmni1-Quad v1-0 B                                       | HumanOmniExpress Exome-8v1_B     | Illumina 610 and Cytochip 370K | Affymetrix Gene Titan, Axion genome-wide human CEU I array plate                           |
| Design                                | Case-control            | Cohort                        | Case-control (4 case groups)                                          | Cohort                           | Case-control                   | Case-control                                                                               |
| Phenotype for cases                   | Hip fracture            | N/A                           | Type 2 diabetes, myocardial infarction, stroke, and venous thrombosis | N/A                              | Colorectal cancer              | Ventricular ectopy (ever)                                                                  |
| Other sample details                  | N/A                     | Minorities                    | Hormone therapy clinical trial                                        | Hormone therapy clinical trial   | N/A                            | Controls selected within centers, years, seasons and visit years in which cases originated |
| Ethnicity                             | Mostly white            | African American and Hispanic | Mostly white                                                          | White                            | White                          | White                                                                                      |
| Sample size <sup>†</sup>              | 3690                    | 11,992                        | 4883                                                                  | 5687                             | 2493                           | 3069                                                                                       |

*GARNET*, Genomics and Randomized Trials Network; *GECCO*, Genetics and Epidemiology of Colorectal Cancer Consortium; *GWAS*, genome-wide association study; *MOPMAP*, Modification of Particulate Matter—Mediated Arrhythmogenesis in Populations; *N/A*, not applicable; *NCI*, National Cancer Institute; *NHGRI*, National Human Genome Research Institute; *NHLBI*, National Heart, Lung, and Blood Institute; *NIEHS*, National Institute of Environmental Health Sciences; *SHARe*, Single-Nucleotide Polymorphism Health Association Resource; *SNP*, single-nucleotide polymorphism; *UNC*, University of North Carolina; *WHIMS*, Women's Health Initiative Memory Study.

\*For some of the data files, these two platforms are considered different studies.

<sup>†</sup>The sample sizes are the number of samples after QC. Note that there are some subjects that are in multiple studies, as detailed herein.

**Supplemental Table VII.** Quality control parameters used for each of the genome-wide association studies

|                                                                    | Hip fracture GWAS             | SHARe                                                     | GARNET                                  | WHIMS+           | GECCO            | MOPMAP           |
|--------------------------------------------------------------------|-------------------------------|-----------------------------------------------------------|-----------------------------------------|------------------|------------------|------------------|
| Minimal sample call rate, %                                        | 98                            | 95                                                        | 98                                      | 97               | 97               | 95               |
| Minimal SNP call rate, %                                           | 98                            | 90                                                        | 98                                      | 98               | 98               | 90               |
| Hardy–Weinberg <i>P</i> value cutoff below which SNPs are excluded | 1 <sup>e-4</sup>              | 1 <sup>e-6</sup>                                          | 1 <sup>e-4</sup>                        | 1 <sup>e-4</sup> | 1 <sup>e-4</sup> | 1 <sup>e-6</sup> |
| Samples used for Hardy–Weinberg calculations                       | Controls of European ancestry | All samples, separate for Hispanics and African Americans | Unrelated controls of European ancestry | All              | Controls         | All              |
| Minimum allele frequency cutoff, %                                 | 1                             | 1                                                         | None                                    | 1                | 5                | 0.5              |

*GARNET*, Genomics and Randomized Trials Network; *GECCO*, Genetics and Epidemiology of Colorectal Cancer Consortium; *GWAS*, genome-wide association study; *MOPMAP*, Modification of Particulate Matter–Mediated Arrhythmogenesis in Populations; *SHARe*, Single-Nucleotide Polymorphism Health Association Resource; *SNP*, single-nucleotide polymorphism; *WHIMS*, Women’s Health Initiative Memory Study.
